# Supplementary material
Source: Springer Nature journal article supplement (https://www.springermedizin.de/resource/supplementary/13012_2013_748_MOESM2_ESM.pdf/9630602)
Supplement: MOESM2 [file 9630602]

|                  | <b>CT</b> | <b>Aspirin</b> | <b>Swallow<br/>Screen</b> | <b>Weight</b> | <b>All elements of<br/>the bundle</b> |
|------------------|-----------|----------------|---------------------------|---------------|---------------------------------------|
| <b>Patient 1</b> | Y         | N              | Y                         | N             | N                                     |
| <b>Patient 2</b> | Y         | N              | N                         | N             | N                                     |
| <b>Patient 3</b> | Y         | Y              | Y                         | Y             | Y                                     |
| <b>Patient 4</b> | N         | Y              | N                         | N             | N                                     |
| <b>Patient 5</b> | Y         | N              | Y                         | Y             | N                                     |
